# Supplementary material
Source: HighWire-hosted journal article supplement (https://tsaco.smart01.highwire.org/content/9/1/e001198)
Supplement: inline-supplementary-material-1 [file inline-supplementary-material-1.pdf]

## Qualitative Interview Guide

*Both groups are assigned to complete the PTSD Checklist 5 (PCL-5) and the Patient Health Questionnaire (PHQ-9) to assess PTSD and depression symptoms, respectively for a total of 29 questions. Both screening questionnaires generally take 3-5 minutes in each to complete.*

### Introduction

Good morning/afternoon. Thank you for agreeing to help us understand how a patient like you feels about using the electronic platform called Blueprint to complete a screening process for post traumatic stress disorder and depression symptoms after an injury. We are doing interviews like this with patients who were hospitalized after an injury to learn about their experience and opinions about Blueprint and using technology to answer questions about mental health.

Are you still agreeable to being interviewed? First, we will have you access Blueprint and try it out. We'll ask your opinions about Blueprint itself and answering questions using Blueprint. Once we finish, I'll will ask you some questions about your opinions about using technology to ask these types of questions and your opinions about how we should help people who screen positive for mental health symptoms after an injury. This will take about an hour to an hour and half total.

### Usability Testing

Each participant receives a link from Blueprint to access Blueprint on their device.

Participant accessed Blueprint by:

- a. Text message
- b. Email
- c. Study laptop/tablet

### 1. Find the link to access Blueprint

Q.1 How do you feel about accessing Blueprint on your device?

- a. Very easy
- b. Easy
- c. Not sure
- d. Difficult
- e. Very difficult

Q.2 Would you like to share your thoughts on this step? (open dialogue)

### 2. Take your first assessment

Q.3 How do you feel about answering these questions on your device?

- a. Very easy
- b. Easy
- c. Not sure
- d. Difficult
- e. Very difficult

Q.4 How easy or difficult is it to read those questions?

- a. Very easy
- b. Easy
- c. Not sure
- d. Difficult
- e. Very difficult

Q.5 How long did it take you to complete your first assessment?

- a. Took longer than I would like
- b. A little bit longer than I would like
- c. Not sure
- d. Just about right

Q.6 Would you like to share your thoughts on this step? (open dialogue)

Please share your thoughts about the Blueprint app? (open dialogue)

**Please complete the brief survey – the System Usability Scale.**

This survey will take only few minutes to complete.

**1. I think I would like to use the Blueprint app frequently.**

Strongly Disagree

(1)       (2)       (3)       (4)       (5)

Strongly Agree

**2. I found the Blueprint app unnecessarily complex.**

Strongly Disagree

(1)       (2)       (3)       (4)       (5)

Strongly Agree

**3. I thought the Blueprint app was easy to use.**

Strongly Disagree

(1)       (2)       (3)       (4)       (5)

Strongly Agree

**4. I think that I would need the support of a technical person to be able to use this system.**

Strongly Disagree

(1)       (2)       (3)       (4)       (5)

Strongly Agree

**5. I found the various functions in the Blueprint app were well integrated.**

Strongly Disagree

Strongly Agree

(1)       (2)       (3)       (4)       (5)

**6. I thought there was too much inconsistency in the Blueprint platform**

Strongly Disagree      Strongly Agree

(1)       (2)       (3)       (4)       (5)

**7. I would imagine that most people would learn to use the Blueprint platform very quickly.**

Strongly Disagree      Strongly Agree

(1)       (2)       (3)       (4)       (5)

**8. I found the Blueprint platform very awkward to use.**

Strongly Disagree      Strongly Agree

(1)       (2)       (3)       (4)       (5)

**9. I felt very confident using the Blueprint platform.**

Strongly Disagree      Strongly Agree

(1)       (2)       (3)       (4)       (5)

**10. I needed to learn a lot of things before I could get going with the Blueprint platform.**

Strongly Disagree      Strongly Agree

(1)       (2)       (3)       (4)       (5)

**Interview**

Thank you for taking the time to test the Blueprint app and give us your opinions. I'm going to ask you a few more questions about your opinions about using technology to answer questions about your mental health. I'm also going to ask your opinion about using technology to give people information about how they can cope with mental health symptoms after an injury.

When we are done, names and other identifying information will be removed from the data, and it will be combined. Then we will look for patterns across interviews, such as "the questions were helpful" or "the computer was hard to use." In reports, we may use a quote from you that highlights a pattern well, but we will not connect them to you.

**Questions about Blueprint Screening**

1. How did you feel about completing those questions?
  - a. What is your opinion about the types of questions you were asked?
    - i. [Look for positive/negative/neutral opinions]
  - b. Did the questions seem important given the injury you experienced?
  - c. Do you think these types of questions should be asked of all people who are hospitalized for an injury?
  - d. What would you change about the questionnaire? (length, wording of questions, did they seem too private or personal)
2. Did answering the questions on the screener help you in any way? Why or why not?
  - a. Were there any questions that stood out to you?
3. From your perspective, how do you think the information from these questions about people's mental health should be used by the UAMS Trauma Team?
  - a. For example, would you want this to be used to help you get mental health services later?
4. Knowing we are trying to decide whether to use these questions to check in with injured patients about how they are doing after leaving the hospital, are there additional comments you'd like to add? Is this something we should do at UAMS?

**Questions about Online Intervention**

Next, I'd like to ask you some questions about your opinions about an online self-help tool designed for people like you who have experienced a traumatic injury that required them to go to the hospital.

1. Have you ever used a website or app for mental health?
  - a. [If yes] what kind of websites or apps have you used?
  - b. What drew you to using a website or app for mental health?
2. Have you ever shared a website or app for mental health with someone directly or on social media platforms?

- a. [If yes] what about it did you find worth sharing?
3. If you were to report that you were experiencing symptoms of PTSD or depression using Blueprint, would you want Blueprint to automatically send you information about online resources specific to your experience?
  - a. If so, what kind of information would you want?
4. If there were to be a website or app specifically designed to talk about mental health for people who have been injured and had to go to the hospital, what things do you think would be important to include?
  - a. For example, what kind of tools, skills or resources would you want to be included? This could include things like how to improve your mood, how to feel more relaxed, or how to talk to others about what happened.
  - b. Thinking about your own recovery after your injury, what types of information would have been most helpful?
  - c. When would you have liked to receive information about mental health after your injury?
    - i. [Probe: during hospitalization, at home, during clinic visit]
5. We are working to develop a website that trauma patients can visit to learn about how their mental health may be impacted by an injury and to learn skills to support coping after being injured and being in the hospital.
  - a. How would you like to receive this information? Videos, written materials, audio files, visuals?
